# Supplementary material for: Stimulating effect of whey protein hydrolysate on bone growth in MC3T3-E1 cells and a rat model
Source: Royal Society of Chemistry journal article supplement (doi:10.1039/d1fo00546d), 2021-01-01
Supplement: d1fo00546d1.pdf [file d1fo00546d1.pdf]

**Table S1:** Effects of whey protein hydrolysate on weight and food and water intake of Sprague-Dawley rats

| Parameter             | Control                    | Whey         | WPH-L         | WPH-H          |
|-----------------------|----------------------------|--------------|---------------|----------------|
| Weight gain (g/day)   | 7.21 ± 0.56                | 7.70 ± 0.10  | 8.09 ± 0.11 * | 8.24 ± 0.47 ** |
| Food intake (g/day)   | 19.93 ± 0.31 <sup>ns</sup> | 19.91 ± 0.48 | 19.34 ± 0.32  | 19.49 ± 0.62   |
| Water intake (mL/day) | 23.86 ± 0.10 <sup>ns</sup> | 23.08 ± 1.78 | 23.67 ± 0.48  | 24.59 ± 0.85   |

CON: 0.9% sodium chloride (NaCl, physiological saline) group; Whey: whey protein (600 mg/kg/day)-treated group; WPH-L: low dose of whey protein hydrolysate (300 mg/kg/day)-treated group; WPH-H: high dose of whey protein hydrolysate (600 mg/kg/day)-treated group. Values are means ± standard deviation (SD). \*p < 0.05 and \*\*p < 0.01 versus control group (CON) according to ANOVA followed by Tukey's multiple comparison test. ns, not significant.
